# Supplementary material
Source: PubMed Central journal article supplement (PMC3346399)
Supplement: supp_78.11.3916_AEM-AEM07820-11-s01.pdf [file supp_78.11.3916_AEM-AEM07820-11-s01.pdf]

## Supplemental Material

**Table S1** Primers used in this study for the detection of antibiotic resistance genes and class 1 and class 2 integrons

| Antimicrobial or integron | Gene                       | Product size (bp) | Primer sequence (5' to 3')                          | Reference                                                                                           |
|---------------------------|----------------------------|-------------------|-----------------------------------------------------|-----------------------------------------------------------------------------------------------------|
| <b>Tetracycline</b>       | <i>tet(A)</i>              | 387               | tet-F -CGCTNTATGCGTTGATGCA<br>ACAGCCCGTCAGGAAATT    | Jun <i>et al.</i><br>2004                                                                           |
|                           | <i>tet(B)</i>              | 171               | TGAAAGCAAACGGCCTAA                                  |                                                                                                     |
|                           | <i>tet(C)</i>              | 631               | CGTGCAAGATTCCGAATA                                  |                                                                                                     |
|                           | <i>tet(D)</i>              | 484               | CCAGAGGTTTAAGCAGTGT                                 |                                                                                                     |
|                           | <i>tet(E)</i>              | 246               | ATGTGTCCTGGATTCT                                    |                                                                                                     |
|                           | <i>tet(G)</i>              | 803               | ATGCCAACACCCCCGGCG                                  |                                                                                                     |
| <b>Ampicillin</b>         | <i>bla<sub>TEM</sub></i>   | 861               | ATGAGTATTCAACATTTCCG<br>TTACCAATGCTTAATCAGTGAG      | Mugnaioli<br><i>et al.</i> 2006<br>Cao <i>et al.</i><br>2002                                        |
|                           | <i>bla<sub>SHV</sub></i>   | 797               | TTATCTCCCTGTTAGCCACC<br>GATTTGCTGATTCGCTCGG         |                                                                                                     |
| <b>Trimethoprim</b>       | <i>dfrA1</i>               | 367               | GGAGTGCCAAAGGTGAACAGC<br>GAGGCGAAGTCTTGGGTAAAAC     | Lapierre <i>et al.</i> 2008                                                                         |
| <b>Streptomycin</b>       | <i>aadA1</i>               | 447               | TATCCAGCTAAGCGCGAACCT<br>ATTTGCCGACTACCTTGGTC       | Lapierre <i>et al.</i> 2008<br>Srinivasan<br><i>et al.</i> 2007<br>Srinivasan<br><i>et al.</i> 2007 |
|                           | <i>strA</i>                | 548               | CTTGGTGATAACGGCAATTC<br>CCAATCGCAGATAGAAGGC         |                                                                                                     |
|                           | <i>strB</i>                | 509               | ATCGTCAAGGGATTGAAACC<br>GGATCGTAGAACATATTGGC        |                                                                                                     |
| <b>Sulphonamides</b>      | <i>sul1</i>                | 433               | CGGCGTGGGCTACCTGAACG<br>GCCGATCGCGTGAAGTTCCG        | Ho <i>et al.</i><br>2009<br>Ho <i>et al.</i><br>2009<br>Saenz <i>et al.</i><br>2010                 |
|                           | <i>sul2</i>                | 285               | GCGCTCAAGGCAGATGGCATT<br>GCGTTTGATACCGGCACCCGT      |                                                                                                     |
|                           | <i>sul3</i>                | 792               | GAGCAAGATTTTTGGAATCG<br>CATCTGCAGCTAACCTAGGGCTTTGGA |                                                                                                     |
| <b>Class 1 integron</b>   | <i>intI1</i>               | 280               | CCTCCCGCACGATGATC<br>TCCACGCATCGTCAGGC              | Lapierre <i>et al.</i> 2008<br>Lapierre <i>et al.</i> 2008                                          |
|                           | 5'CS class1<br>3'CS class1 | Variable          | GGCATCCAAGCAGCAAG<br>AAGCAGACTTGACCTGA              |                                                                                                     |
| <b>Class 2 integron</b>   | <i>intI2</i>               | 232               | TTATTGCTGGGATTAGGC<br>ACGGCTACCCTCTGTTATC           | Lapierre <i>et al.</i> 2008                                                                         |

## Supplemental References

- **Cao, V., Lambert, T., Nhu, D.Q., Loan, H.K., Hoang, N.K., Arlet, G., Courvalin, P.** 2002. Distribution of extended-spectrum beta-lactamases in clinical isolates of *Enterobacteriaceae* in Vietnam. *Antimicrob. Agents Chemother.* **46**:3739–3743.
- **Mugnaioli, C., Luzzaro, F., De Luca, F., Brigante, G., Perilli, M., Amicosante, G., Stefani, S., Toniolo, A., Rossolini, G.M.** 2006. CTX-M-Type Extended-Spectrum  $\beta$ -Lactamases in Italy: Molecular Epidemiology of an Emerging Countrywide Problem. *Antimicrob. Agents Chemother.* **50**:2700-2706.
- **Saenz, Y., Vinué, L., Ruiz, E., Somalo, S., Martínez, S., Rojo-Bezares, B., Zarazaga, M., Torres, C.** 2010. Class 1 integrons lacking *qacED1* and *sul1* genes in *Escherichia coli* isolates of food, animal and human origins. *Vet. Microbiol.* **144**:493–497.
- **Srinivasan, V., Nam, H.M., Sawant, A.A., Headrick, S.I., Nguyen, L.T., Oliver, S.P.** 2008. Distribution of tetracycline and streptomycin resistance genes and class 1 integrons in *Enterobacteriaceae* isolated from dairy and nondairy farm soils. *Microb. Ecol.* **55**:184–193.
